# Supplementary material
Source: PubMed Central journal article supplement (PMC1172280)

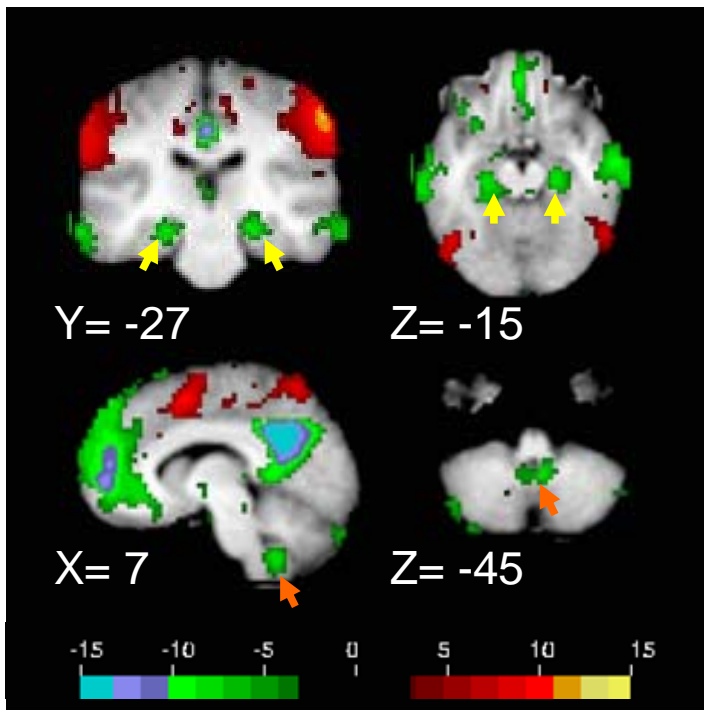

Supplement: pnas_0504136102_1.pdf [file pnas_0504136102_1.pdf]

Fixation

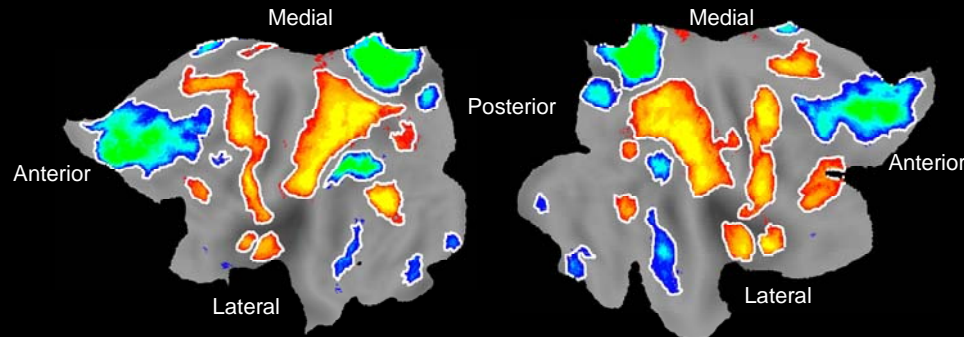

Eyes Closed

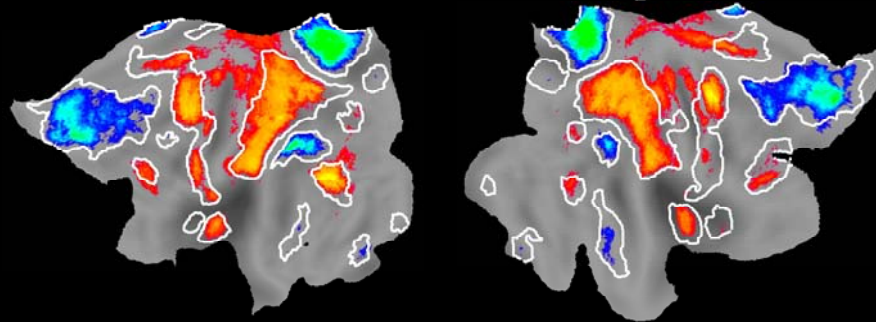

Eyes Open  
(no fixation)

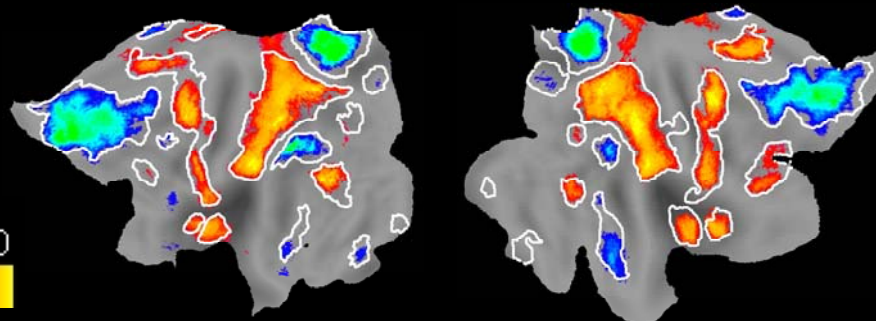

-10.0 0.0 10.0

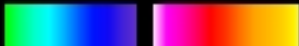

Supplement: pnas_0504136102_2.pdf [file pnas_0504136102_2.pdf]
